# Supplementary material for: Comparison of five automated hematology analyzers in a university hospital setting: Abbott Cell-Dyn Sapphire, Beckman Coulter DxH 800, Siemens Advia 2120i, Sysmex XE-5000, and Sysmex XN-2000
Source: publisher site journal article supplement (doi:10.1515/cclm-2014-0945), 2015-01-01
Supplement: Supplementary file 1 [file Suppl figcaption.doc]

**Supplemental Figure 1 Inter-instrument comparison of blood count parameters and reticulocyte counts.**

Inter-instrument comparisons of blood counts and reticulocyte counts were performed in 349 routine samples. Individual measurements for each analyzer were compared to the median of all 5 analyzers. The line in the scatter plot represents identity. (A) WBC count, (B) RBC count, (C) hemoglobin concentration, (D) hematocrit, (E) MCV, (F) MCH, (G) PLT count, (H) reticulocyte count.

**Supplemental Figure 2** **Inter-instrument comparison of differential blood counts and comparison to microscopy.**

Automated and manual differential blood counts were compared in samples without blasts or variant lymphocytes in blood smear (n = 292). Individual measurements for each analyzer were compared to the median of all 5 analyzers (A, C, E, G) or to manual count (B, D, F, G). The line in the scatter plot represents identity. (A, B) neutrophil count, (C, D) lymphocyte count, (E, F) monocyte count, (G, H) eosinophil count. Samples with a difference of more than 5  10³/µL between automated and microscopic neutrophil counts are circled.
