# Supplementary material for: Comparison of five automated hematology analyzers in a university hospital setting: Abbott Cell-Dyn Sapphire, Beckman Coulter DxH 800, Siemens Advia 2120i, Sysmex XE-5000, and Sysmex XN-2000
Source: publisher site journal article supplement (doi:10.1515/cclm-2014-0945), 2015-01-01
Supplement: Supplementary file 4 [file Supplemental_Table__1_CCLM_bruegel_2014_revision_CCLM.2014.0945_R2.docx]

**Supplemental Table 1** Inter-instrument comparison of required whole blood volume for analysis of complete blood count

|  | **Minimal volumes (µL) generating results when using different tubes** | | | |
| --- | --- | --- | --- | --- |
| **Instrument** | **2.7 mL  Sarstedt tube** | **1.2 mL  Sarstedt tube** | **1.0 mL Siemens EZEE-nest tube** | **1.5 mL Sarstedt  micro tube** |
| Cell-Dyn Sapphire | ≥ 300 | ≥ 300 | ≥ 150 | ≥ 150 |
| DxH 800 | > 500 | ≥ 300 | ≥ 200 | ≥ 200 |
| Advia 2120i | > 500 | > 500 | ≥ 150 | ≥ 150 |
| XE-5000 | > 500 | > 500 | ≥ 150 | ≥ 300 |
| XN-2000 | ≥ 500 | ≥ 200 | ≥ 150 | ≥ 150 |
