# Supplementary figures and images for: Comparison of five automated hematology analyzers in a university hospital setting: Abbott Cell-Dyn Sapphire, Beckman Coulter DxH 800, Siemens Advia 2120i, Sysmex XE-5000, and Sysmex XN-2000
Source: publisher site journal article supplement (doi:10.1515/cclm-2014-0945), 2015-01-01

Supplemental Figure 1


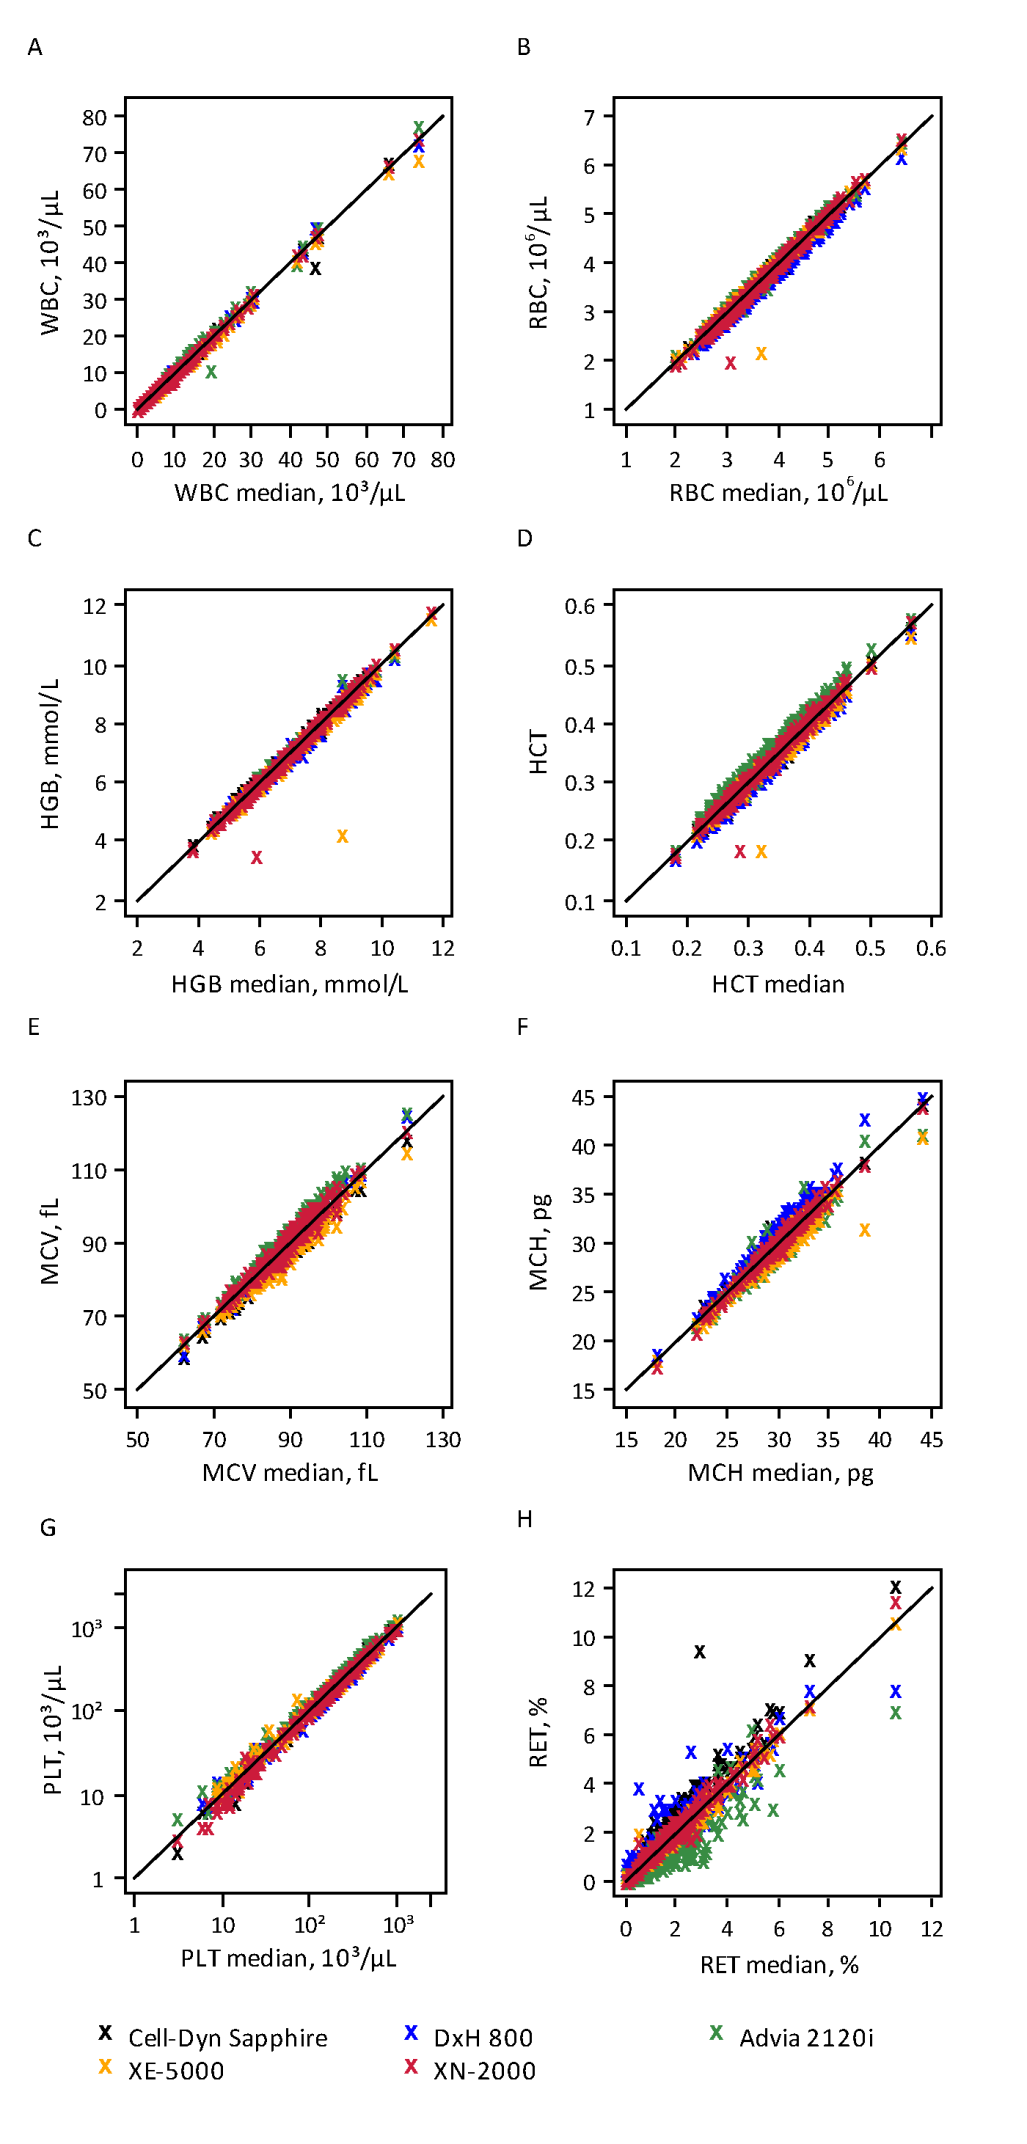

Supplement: Supplementary file 2 [file Supplemental_Figure_1_CCLM_bruegel_2014_revision_CCLM.2014.0945_R2_V2.docx]

Supplemental Figure 2


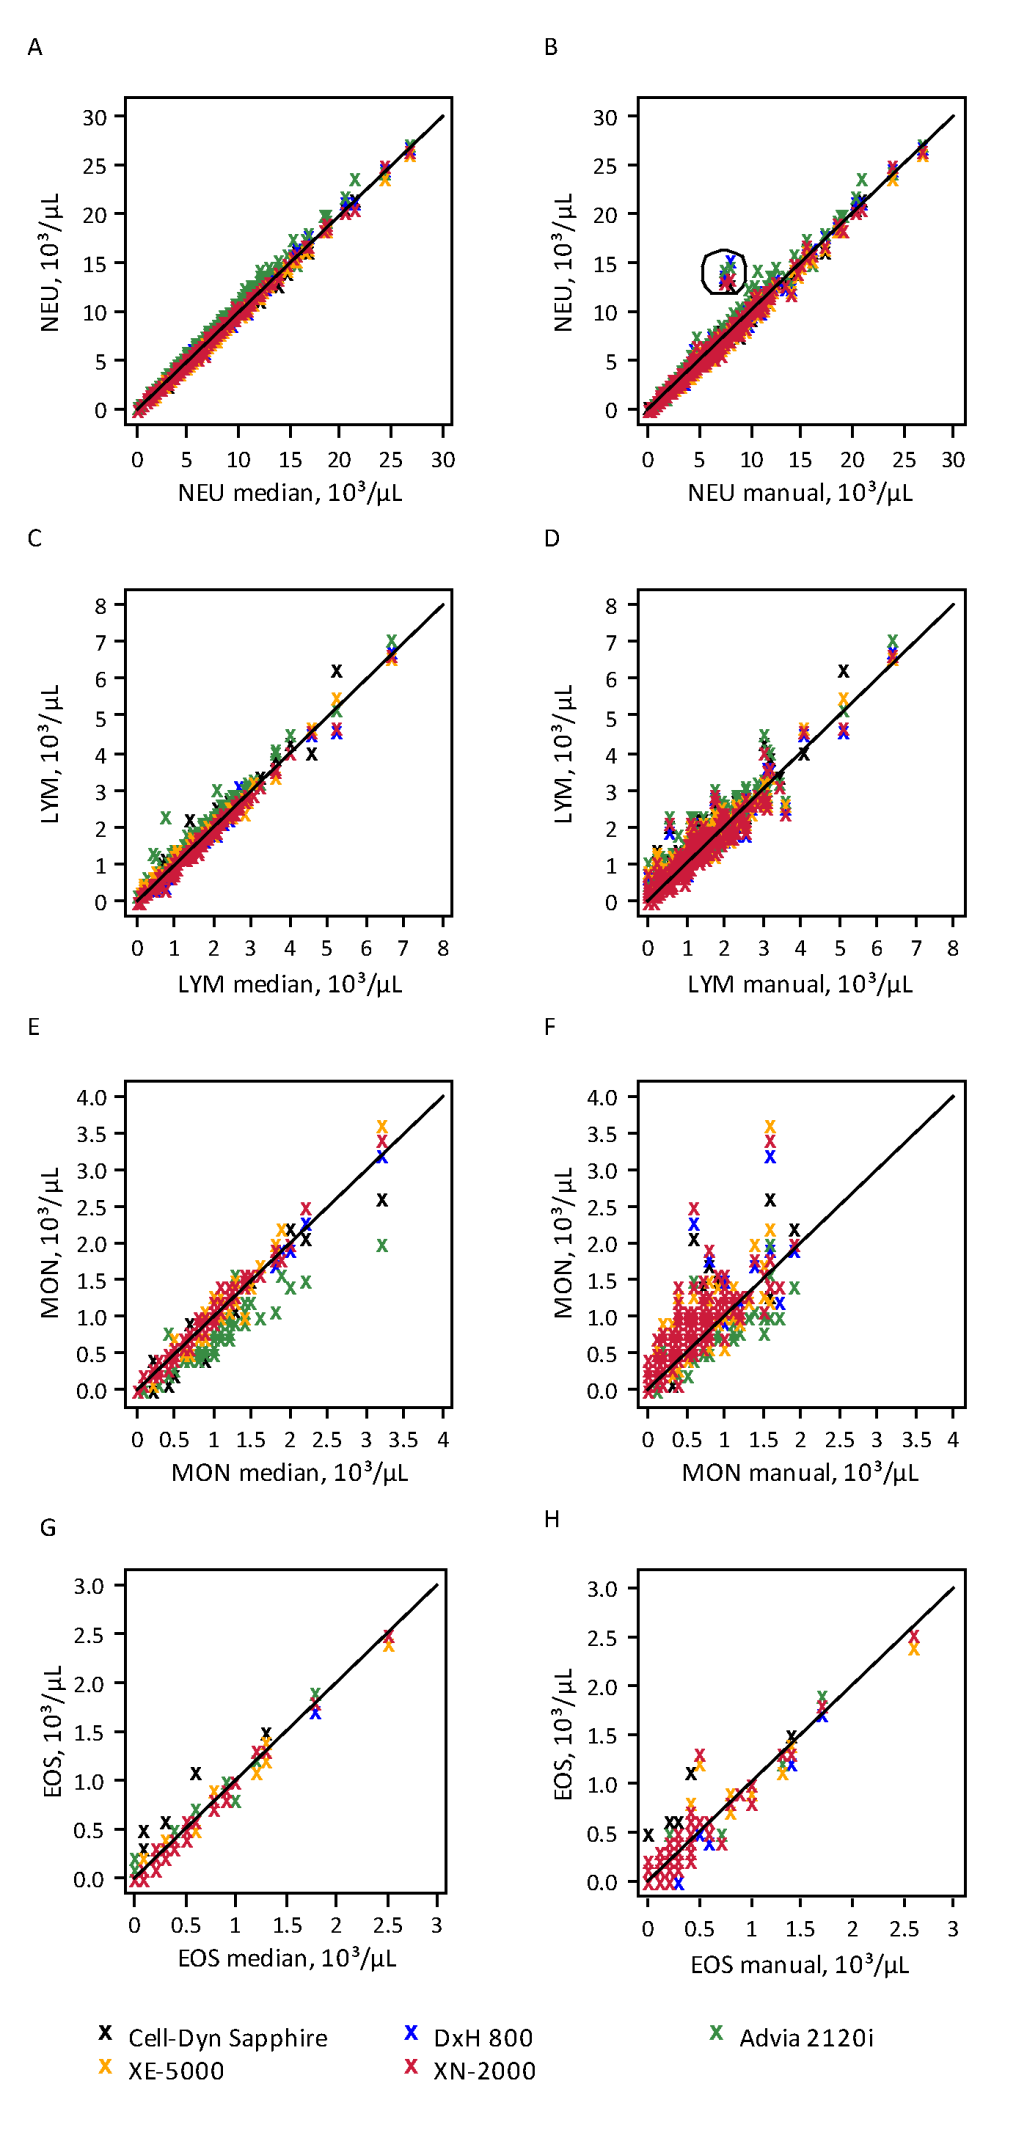

Supplement: Supplementary file 3 [file Supplemental_Figure_2_CCLM_bruegel_2014_revision_CCLM.2014.0945_R2_V2.docx]
